# Supplementary material for: Reactive oxygen species-scavenging hollow MnO2 nanozymes as carriers to deliver budesonide for synergistic inflammatory bowel disease therapy
Source: Royal Society of Chemistry journal article supplement (doi:10.1039/d1bm01525g), 2021-11-26
Supplement: d1bm01525g1.pdf [file d1bm01525g1.pdf]

## Supplementary data

### **Reactive Oxygen Species Scavenging Hollow MnO<sub>2</sub> Nanozymes as Carriers Deliver Budesonide for the Synergistic Inflammatory Bowel Disease Therapy**

Huiqiang Qiu<sup>a</sup>, Hengtai Gong<sup>a</sup>, Yuheng Bao<sup>a</sup>, Hong Jiang<sup>b\*</sup>, Weijun Tong<sup>a\*</sup>

<sup>a</sup>MOE Key Laboratory of Macromolecular Synthesis and Functionalization, Department of Polymer Science and Engineering, Zhejiang University, Hangzhou 310027, China.

Email: tongwj@zju.edu.cn (W. Tong)

<sup>b</sup> Kidney Disease Center, College of Medicine, The First Affiliated Hospital, Zhejiang University, Hangzhou 310027, China.

Email: jianghong961106@zju.edu.cn (H. Jiang)

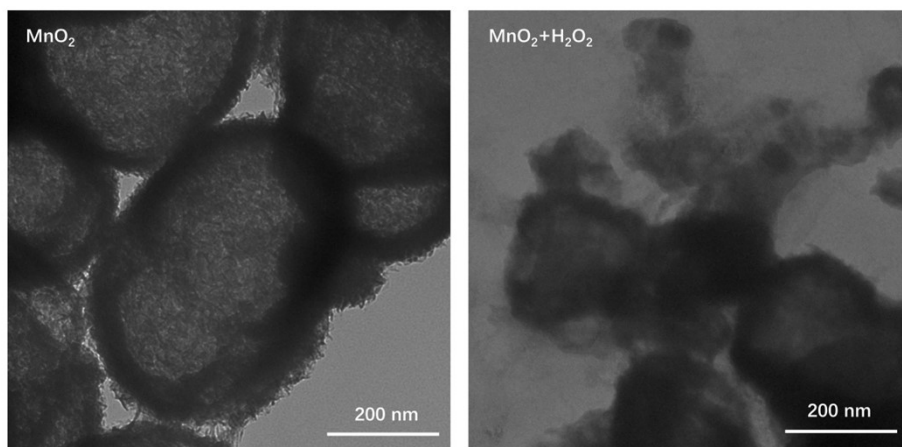

**Figure S1.** TEM images of hMnO<sub>2</sub> NPs before (left) and after incubated with 100 μM H<sub>2</sub>O<sub>2</sub> for 0.5 h (right).

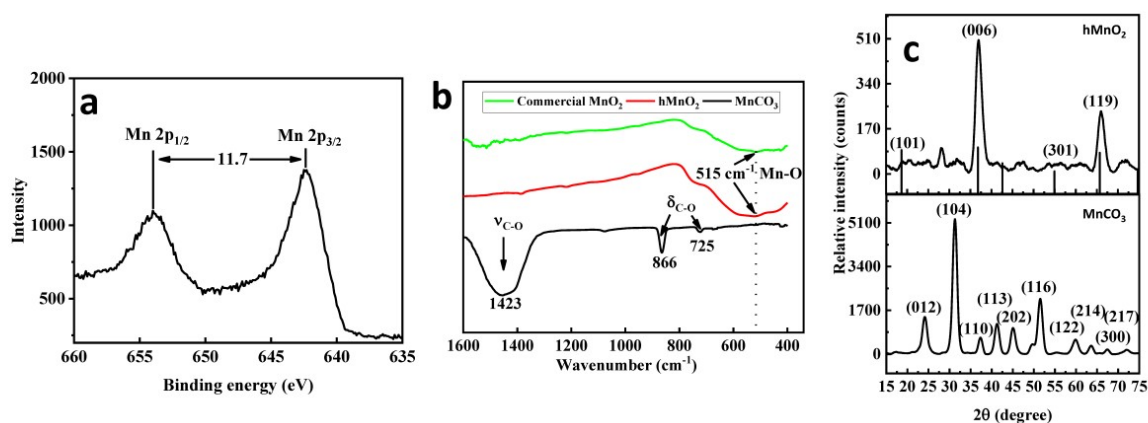

**Figure S2.** XPS (a), infrared spectroscopy (b) and XRD pattern (c) of hMnO<sub>2</sub> NPs. In b, the spectra of commercial MnO<sub>2</sub> and MnCO<sub>3</sub> were also presented for comparison. In c, the lines at the bottom represent the reference pattern of MnO<sub>2</sub> from PDF#18-0802 and the XRD pattern of MnCO<sub>3</sub>.

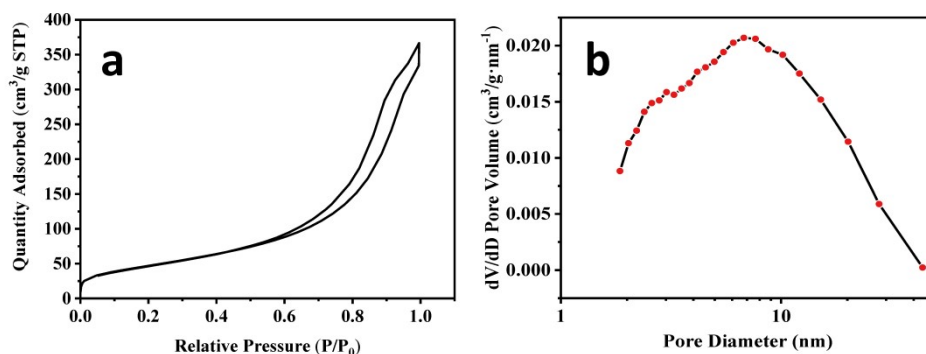

**Figure S3.** Nitrogen adsorption–desorption isotherms (a) and pore size distributions (b) of hMnO<sub>2</sub> NPs.

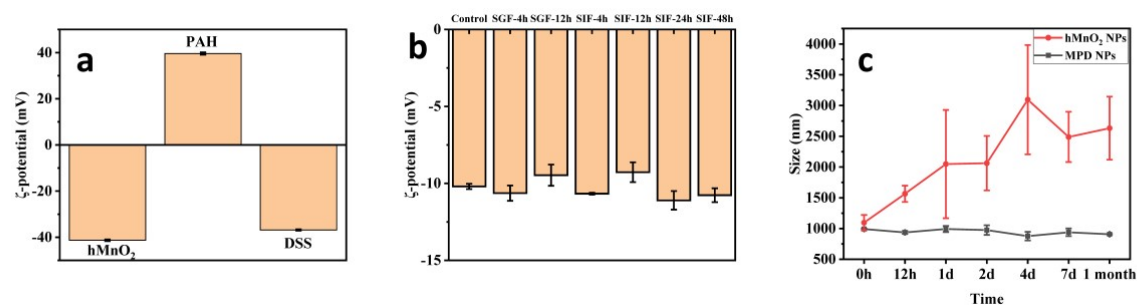

**Figure S4.** (a) The  $\zeta$ -potential reverses during the preparation of MPD NPs; (b) The  $\zeta$ -potential of MPDB NPs after incubation with SGF or SIF for different times; (c) The size stability of hMnO<sub>2</sub> NPs and MPD NPs.

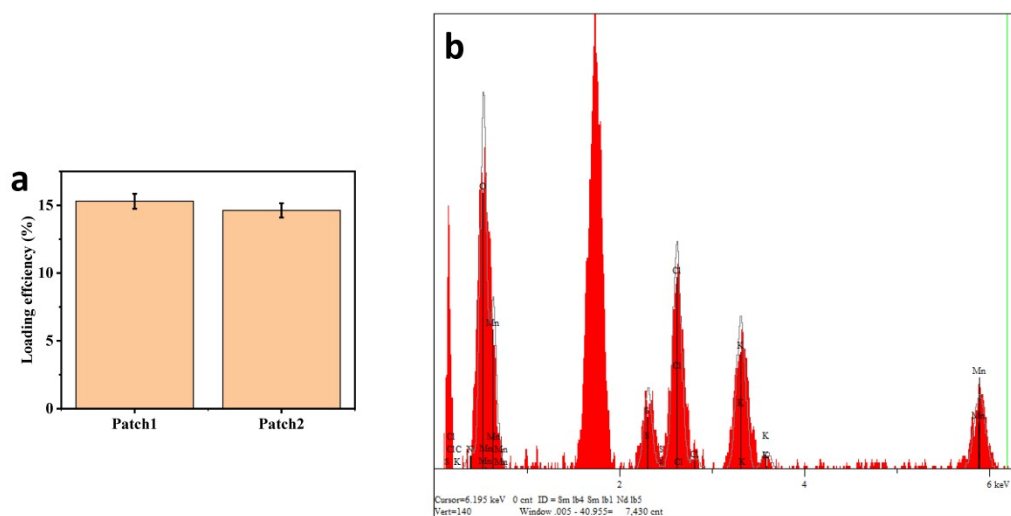

**Figure S5.** (a) The drug-loading efficiency of MPDB NPs; (b) EDX of MPDB NPs.

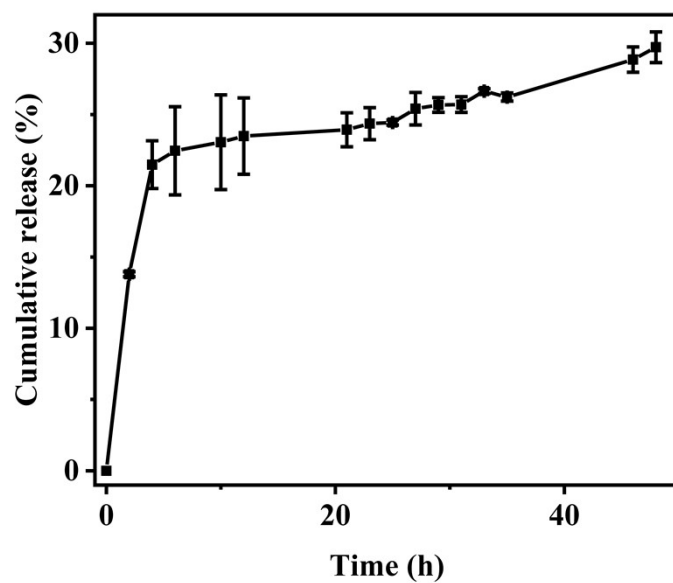

**Figure S6.** Bud release curve from MPDB NPs in PBS for 48h.

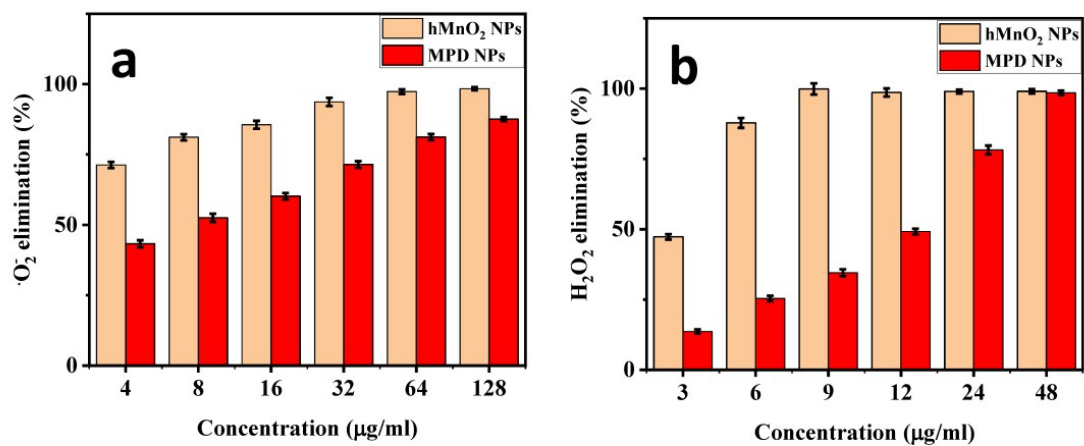

**Figure S7.** The elimination rate of  $\cdot\text{O}_2^-$  (a) and  $\text{H}_2\text{O}_2$  (b) treated by hMnO<sub>2</sub> and MPD NPs of different concentrations.

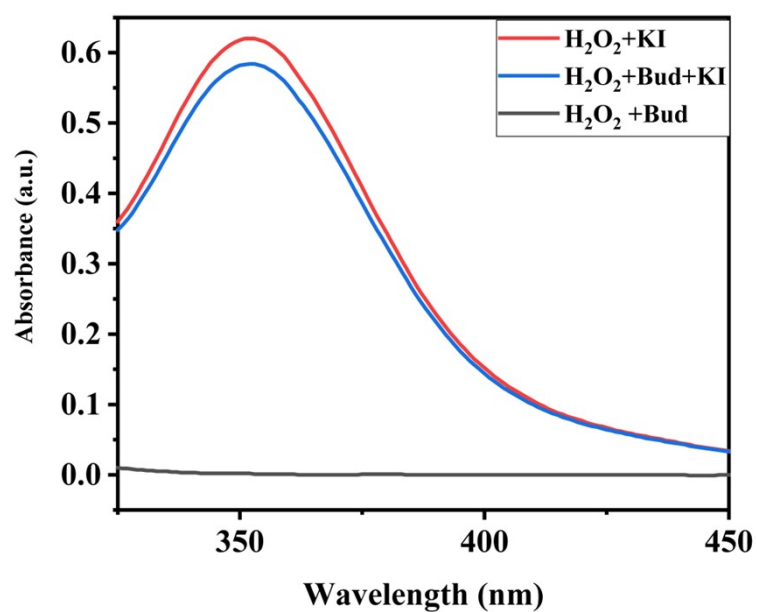

**Figure S8.** The UV-vis spectra of  $I_3^-$ , the product of the reaction of KI and residual  $H_2O_2$  after incubation with Bud.

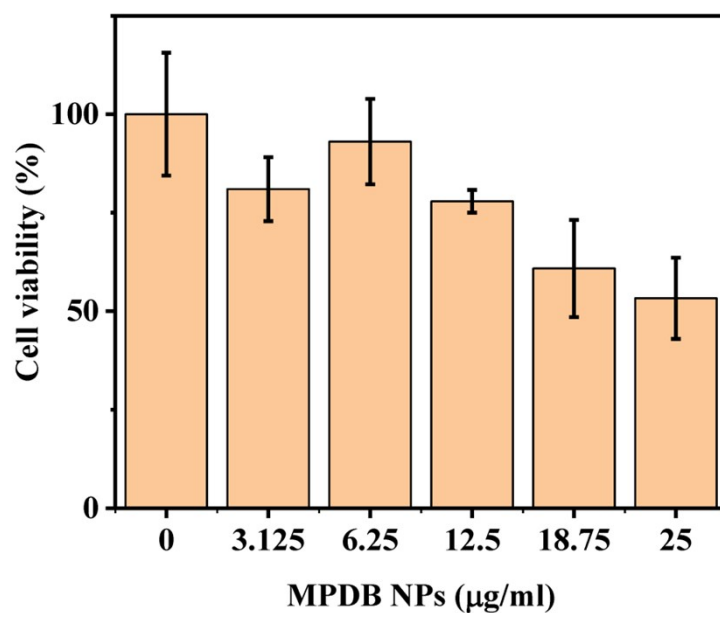

**Figure S9.** HT-29 cell viability incubated with different concentrations of MPDB NPs.

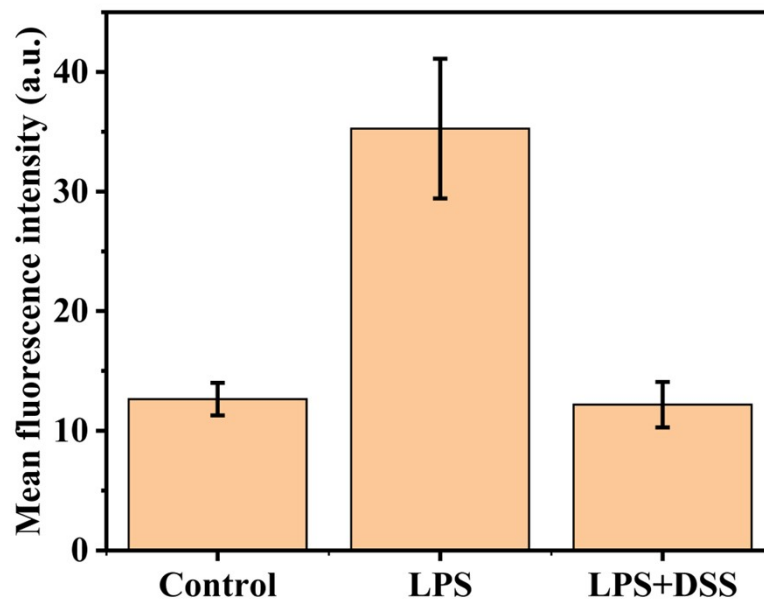

**Figure S10.** The corresponding mean fluorescence intensity values of RAW264.7 cells in targeting ability test (Figure 4).

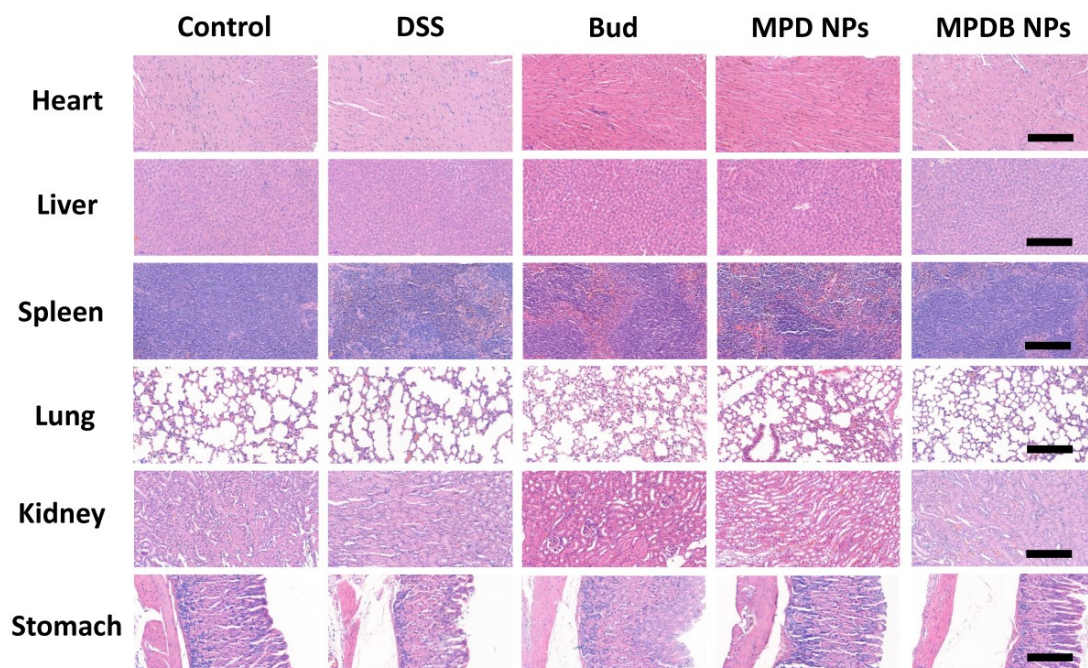

**Figure S11.** Hematoxylin and eosin stained pathological sections of major organs of mice with different treatments on day 6, scale bar=200  $\mu$ m.
